# Supplementary material
Source: PubMed Central journal article supplement (PMC8105263)
Supplement: NIHMS1649951-supplement-Supplemental_Material.pdf [file NIHMS1649951-supplement-Supplemental_Material.pdf]

## SUPPLEMENTAL MATERIAL

HDL Subclasses, Lipid Content, and Function trajectories across the Menopause Transition: SWAN-HDL Study

Running title: HDL metric changes over the menopause transition

Samar R. El Khoudary, PhD;<sup>a</sup> Xirun Chen, MPH;<sup>a</sup> Alexis Nasr, MD;<sup>a</sup> Jeff Billheimer, PhD;<sup>b</sup> Maria Mori Brooks, PhD;<sup>a</sup> Dan McConnell, PhD;<sup>c</sup> Trevor Orchard, MD;<sup>a</sup> Sybil Crawford, PhD;<sup>d</sup> Karen A. Matthews, PhD;<sup>e</sup> Daniel J Rader, MD.<sup>b</sup>

Total word counts (text from introduction through the conclusion, references, and figure legends): 4,966 words

a Graduate School of Public Health, University of Pittsburgh

b Perelman School of Medicine, University of Pennsylvania

c Central Ligand Assay Satellite Services (CLASS) Laboratories, University of Michigan

d Graduate School of Nursing, University of Massachusetts Medical School

e School of medicine, University of Pittsburgh

### Correspondence

Samar R. El Khoudary, PhD, MPH, FAHA

Associate Professor of Epidemiology, Clinical and Translational Science Institute

Epidemiology Data Center

4420 Bayard Street, Suite 600

Pittsburgh, PA, 15260

Phone: 412-624-5543

Fax: 412-624-3774

Email: [elkhoudarys@edc.pitt.edu](mailto:elkhoudarys@edc.pitt.edu)

**Supplemental Table I. Longitudinal associations of HDL conventional and composition metrics with HDL-CEC% by menopause stage**

| HDL metrics                     | HDL-CEC%            |         |                      |         |                      |         | P value for Interaction with menopause stage † |
|---------------------------------|---------------------|---------|----------------------|---------|----------------------|---------|------------------------------------------------|
|                                 | Premenopause stage* |         | Perimenopause stage* |         | Postmenopause stage* |         |                                                |
|                                 | β(SE) ‡             | P value | β(SE) ‡              | P value | β(SE) ‡              | P value |                                                |
| HDL-C, mg/dL                    | 0.028(0.002)        | <.0001  | 0.024(0.002) ?       | <.0001  | 0.029(0.002)         | <.0001  | 0.08                                           |
| apoA1, mg/dL                    | 0.016(0.001)        | <.0001  | 0.012(0.001) §       | <.0001  | 0.012(0.001)         | <.0001  | 0.01                                           |
| Total HDL-P, umol/L             | 0.051(0.005)        | <.0001  | 0.044(0.005)         | <.0001  | 0.042(0.004)         | <.0001  | 0.34                                           |
| Large HDL-P, umol/L             | 0.107(0.009)        | <.0001  | 0.076(0.009) §?      | <.0001  | 0.099(0.007)         | <.0001  | 0.02                                           |
| Medium HDL-P, umol/L            | 0.027(0.005)        | <.0001  | 0.034(0.005)         | <.0001  | 0.033(0.005)         | <.0001  | 0.29                                           |
| Small HDL-P, umol/L             | -0.012(0.005)       | 0.0139  | -0.012(0.005)        | 0.0312  | -0.015(0.004)        | 0.0009  | 0.34                                           |
| HDL size, nm                    | 0.565(0.062)        | <.0001  | 0.370(0.064) ?       | 0.0001  | 0.496(0.056)         | <.0001  | 0.03                                           |
| HDL-PL, mg/dL                   | 0.045(0.002)        | <.0001  | 0.038(0.003)         | <.0001  | 0.042(0.002)         | <.0001  | 0.76                                           |
| HDL-Tg (log-transformed), mg/dL | 0.534(0.105)        | <.0001  | 0.592(0.121)         | 0.0004  | 0.531(0.095)         | <.0001  | 0.71                                           |

\* Menopause stages were identified based on the following cut points of years relative to the FMP for HDL-CEC as identified by LOESS plots [Premenopause: 0.5 years before FMP; Perimenopause: 0.5 years before FMP to 1.5 years after FMP; Postmenopause: 1.5 years after FMP]

† Significant interaction indicate that longitudinal associations of HDL metric with HDL-CEC vary by menopause stage relative to FMP.

‡ Models adjusted for study site, race/ethnicity, time varying age, body mass index, and C3

§ Significantly differs from premenopause stage from the model with interaction term

? Significantly differs from postmenopause stage from the model with interaction term

apoA1: apolipoprotein A1; C3: complement protein C3; FMP: final menstrual period; HDL-C: high-density lipoprotein cholesterol; HDL-CEC: high-density lipoprotein cholesterol efflux capacity; HDL-P: high-density lipoprotein particles; HDL-PL: high-density lipoprotein phospholipids; HDL-Tg: high-density lipoprotein triglycerides

**Major Resources Table**

NA
